# Supplementary material
Source: PubMed Central journal article supplement (PMC3454875)
Supplement: supp_112.141465_141465SI.pdf [file supp_112.141465_141465SI.pdf]

*rtn1Δ yop1Δ*

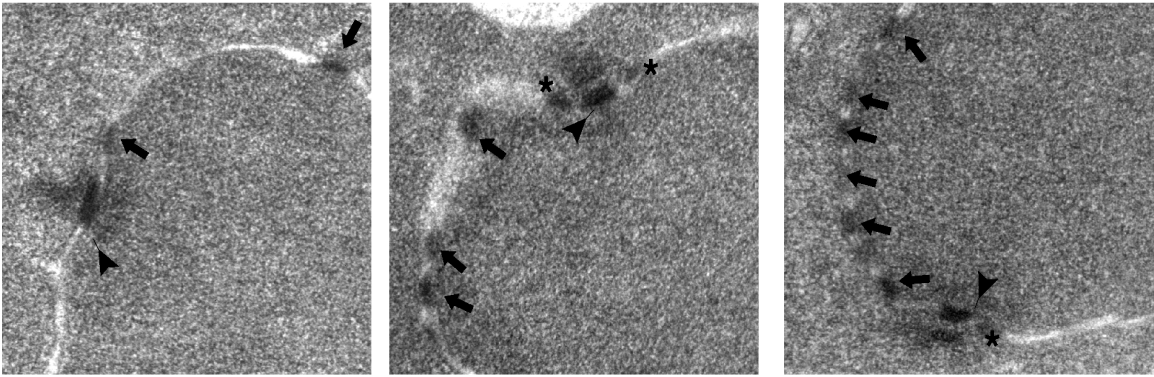

**Figure S1** Deletion of *RTN1* and *YOP1* result in abnormalities in the SPB. *rtn1Δ yop1Δ* (SWY3811) cells were grown to early log phase at 23°C and processed for TEM. Scale bar, 100 nm. Arrowheads point to SPBs, arrows point to NPCs, asterisks indicate abnormal lobular structures on SPBs.

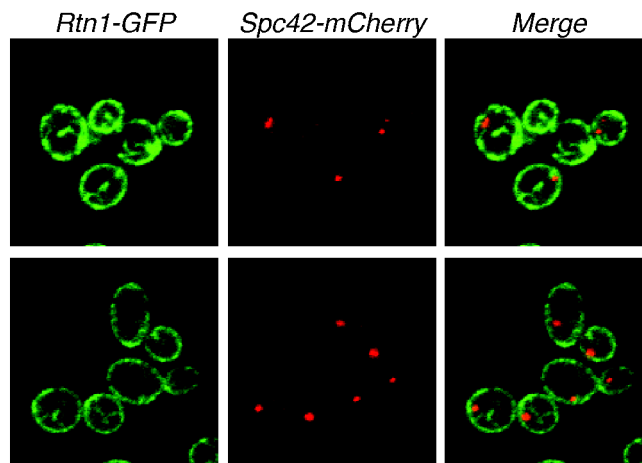

**Figure S2** Rtn1 does not colocalize with SPBs. Asynchronous cultures of *nup120Δ RTN1-GFP(SWY4047)* expressing pSPC42-MCHERRY were grown to log phase and imaged. Scale bar, 2  $\mu$ m

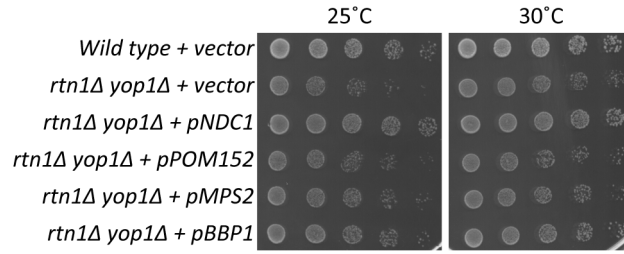

**Figure S3** Overexpression of NDC1 results in rescue of *rtn1Δ yop1Δ* growth defects. Wildtype or *rtn1Δ yop1Δ* cells were transformed with plasmids expressing *NDC1*, *POM152*, *MPS2*, *BBP1*, or empty vector and grown to early log phase at 30°C in synthetic media lacking leucine. Strains were tested for growth at 25°C and 30°C.

**Table S1 Yeast strains used in this study.**

| Strain         | Genotype                                                                                                             | Source                            |
|----------------|----------------------------------------------------------------------------------------------------------------------|-----------------------------------|
| BY4741         | <i>MATa his3Δ1 leu2Δ0 LYS2 met15Δ0 ura3Δ0</i>                                                                        | (MORTIMER and JOHNSTON 1986)      |
| BY4742         | <i>MATα his3Δ1 leu2Δ0 lys2Δ0 MET15 ura3Δ0</i>                                                                        | (MORTIMER and JOHNSTON 1986)      |
| Bbp1-GFP       | <i>MATa BBP1-GFP:HIS3 his3Δ1 leu2Δ0 met15Δ0 ura3Δ0</i>                                                               | (HUH <i>et al.</i> 2003)          |
| Ndc1-GFP       | <i>MATa NDC1-GFP:HIS3 his3Δ1 leu2Δ0 met15Δ0 ura3Δ0</i>                                                               | (HUH <i>et al.</i> 2003)          |
| Rtn1-GFP       | <i>MATa RTN1-GFP:HIS3 his3Δ1 leu2Δ0 met15Δ0 ura3Δ0</i>                                                               | (HUH <i>et al.</i> 2003)          |
| Ndc1-TAP       | <i>MATa NDC1-TAP:HIS3 his3Δ1 leu2Δ0 met15Δ0 ura3Δ0</i>                                                               | (GHAEMMAGHAMI <i>et al.</i> 2003) |
| <i>nup120Δ</i> | <i>MATa nup120::KanR his3Δ1 leu2Δ0 met15Δ0 ura3Δ0</i>                                                                | (WINZELER <i>et al.</i> 1999)     |
| <i>nup133Δ</i> | <i>MATa nup133::KanR his3Δ1 leu2Δ0 met15Δ0 ura3Δ0</i>                                                                | (WINZELER <i>et al.</i> 1999)     |
| SLJ001         | <i>MATa bar1::hisG;ura3-1;leu2-3,112;trp1-1;his3-11,15;ade2-1;can1-100;GAL+</i>                                      | This Study                        |
| SLJ173         | <i>MATα bar1::hisG;ura3-1;leu2-3,112;trp1-1;his3-11,15;ade2-1;can1-100;GAL+</i>                                      | This Study                        |
| SLJ1433        | <i>MATa trp1::GAL-myc-SPC42-TRP1</i>                                                                                 | (JASPERSEN <i>et al.</i> 2002)    |
| SLJ3828        | <i>MATa yop1::HygR rtn1::KanR trp1::GAL-myc-SPC42-TRP1</i>                                                           | This Study                        |
| SLJ5572        | <i>MATa his3Δ200 trp1-901 leu2-3,112 ade2 LYS2:::(lexAop)4-HIS3 ura3:::(lexAop)8-lacZ ade2:::(lexAop)8-ADE2 GAL4</i> | This Study                        |
| SLJ5975        | <i>MATα NDC1-3×HA-HIS3MX6:</i>                                                                                       | This Study                        |
| SLJ5976        | <i>MATa YOP1-3×FLAG-KanR</i>                                                                                         | This Study                        |
| SLJ5977        | <i>MATα NDC1-3×HA-HIS3MX6 YOP1-3×FLAG-KanR</i>                                                                       | This Study                        |
| SLJ5572        | <i>MATa his3Δ200 trp1-901 leu2-3,112 ade2 LYS2:::(lexAop)4-HIS3 ura3:::(lexAop)8-lacZ (lexAop)8-ADE2 GAL4</i>        | Dual Biotech NMY51                |
| SWY3810        | <i>MATa rtn1::KanR yop1::KanR ura3Δ0 leu2Δ0 met15Δ0 his3Δ1</i>                                                       | (DAWSON <i>et al.</i> 2009)       |
| SWY3811        | <i>MATα rtn1::KanR yop1::KanR ura3Δ0 leu2Δ0 his3Δ1 lys2Δ0</i>                                                        | (DAWSON <i>et al.</i> 2009)       |
| SWY4047        | <i>MATα nup133::KanR RTN1-GFP:HIS3 ura3Δ0 leu2Δ0 his3Δ1 lys2Δ0</i>                                                   | (DAWSON <i>et al.</i> 2009)       |
| SWY4522        | <i>MATa NDC1-GFP:HIS3 his3Δ1 met15Δ0 ura3Δ0 leu2Δ0::DsRed-HDEL:LEU2</i>                                              | This Study                        |
| SWY4616        | <i>MATα GFP-TUB3 his3Δ1 leu2Δ0 ura3Δ0 met15Δ0</i>                                                                    | This Study                        |
| SWY4617        | <i>MATa GFP-TUB3 his3Δ1 leu2Δ0 ura3Δ0 met15Δ0</i>                                                                    | This Study                        |
| SWY4636        | <i>MATα NDC1-TAP:HIS3 RTN1-GFP:HIS3 his3Δ1 leu2Δ0 ura3Δ0</i>                                                         | This Study                        |
| SWY4637        | <i>MATa NDC1-TAP:HIS3 RTN1-GFP:HIS his3Δ1 leu2Δ0 ura3Δ0</i>                                                          | This Study                        |
| SWY4725        | <i>MATα rtn1::KanR yop1::KanR NIC96-GFP:HIS3 met15Δ0 his3Δ1 leu2Δ0 ura3Δ0</i>                                        | This Study                        |
| SWY4877        | <i>MATα rtn1::KanR yop1::KanR GFP-TUB3 his3Δ1 leu2Δ0 ura3Δ0 met15Δ0</i>                                              | This Study                        |
| SWY4878        | <i>MATα rtn1::KanR yop1::KanR GFP-TUB3 his3Δ1 leu2Δ0 ura3Δ0 met15Δ0</i>                                              | This Study                        |
| SWY4906        | <i>MATa rtn1::KanR yop1::KanR leu2Δ0::DsRed-HDEL:LEU2 ndc1-GFP:HIS3 ura3Δ0</i>                                       | This Study                        |

|         |                                                                                                |            |
|---------|------------------------------------------------------------------------------------------------|------------|
| SWY4934 | <i>MATa rtn1::KanR yop1::KanR GFP-TUB3 his3Δ1 leu2Δ0 ura3Δ0 lys2Δ0</i>                         | This Study |
| SWY4935 | <i>MATa rtn1::KanR yop1::KanR GFP-TUB3 his3Δ1 leu2Δ0 ura3Δ0 met15Δ0</i>                        | This Study |
| SWY4950 | <i>MATa rtn1::KanR yop1::KanR BBP1-GFP:HIS3 NIC96-mcherry:HYGB his3Δ1 leu2Δ0 ura3Δ0 lys2Δ0</i> | This Study |
| SWY4970 | <i>MATa NIC96-mcherry:HYGB BBP1-GFP:HIS3 his3Δ1 leu2Δ0 ura3Δ0</i>                              | This Study |
| SWY4971 | <i>MATa nup120::KanR NIC96-mcherry:HYGB BBP1-GFP:HIS3 his3Δ1 leu2Δ0 ura3Δ0</i>                 | This Study |
| SWY4972 | <i>MATa rtn1::KanR yop1::KanR SEC63-GFP:HIS3 his3Δ1 leu2Δ0::DsRED-HDEL:LEU2 ura3Δ0</i>         | This Study |
| SWY5033 | <i>MATα nup133::KanR NIC96-mcherry:HYGB BBP1-gfp:HIS3 his3Δ1 leu2Δ0 ura3Δ0 lys2Δ0 met15Δ0</i>  | This Study |

---

\* All strains beginning with "SLJ" are derivatives of W303 and all strains beginning with "SWY" are derivatives of S288C.

DAWSON, T. R., M. D. LAZARUS, M. W. HETZER and S. R. WENTE, 2009 ER membrane-bending proteins are necessary for de novo nuclear pore formation. *J Cell Biol* 184: 659-675.

GHAEMMAGHAMI, S., W. K. HUH, K. BOWER, R. W. HOWSON, A. BELLE *et al.*, 2003 Global analysis of protein expression in yeast. *Nature* 425: 737-741.

HUH, W. K., J. V. FALVO, L. C. GERKE, A. S. CARROLL, R. W. HOWSON *et al.*, 2003 Global analysis of protein localization in budding yeast. *Nature* 425: 686-691.

JASPERSEN, S. L., T. H. GIDDINGS and M. WINEY, 2002 Mps3p is a novel component of the yeast spindle pole body that interacts with the yeast centrin homologue Cdc31p. *J Cell Biol* 159: 945-956.

MORTIMER, R. K., and J. R. JOHNSTON, 1986 Genealogy of principal strains of the yeast genetic stock center. *Genetics* 113: 35-43.

WINZELER, E. A., D. D. SHOEMAKER, A. ASTROMOFF, H. LIANG, K. ANDERSON *et al.*, 1999 Functional characterization of the *S. cerevisiae* genome by gene deletion and parallel analysis. *Science* 285: 901-906.

**Table S2 Plasmids used in this study.**

| Plasmid     | Genotype                                                              | Source                            |
|-------------|-----------------------------------------------------------------------|-----------------------------------|
| dRed-HDEL   | <i>trp1::DsRED-HDEL:TRP1</i> integration plasmid                      | (BEVIS <i>et al.</i> 2002)        |
| pBS35       | <i>mCHERRY/HYGB</i> integration plasmid                               | (SHANER <i>et al.</i> 2004)       |
| pRS315      | CEN/ <i>LEU2</i>                                                      | (SIKORSKI and HIETER 1989)        |
| pRS425      | 2 $\mu$ / <i>LEU2</i>                                                 | (CHRISTIANSON <i>et al.</i> 1992) |
| pRS315.NDC1 | <i>NDC1</i> /CEN/ <i>LEU2</i>                                         | (CHIAL <i>et al.</i> 1998)        |
| PSJ906      | <i>SPC42-mCHERRY-HIS/LEU2</i>                                         | This Study                        |
| PSW863      | <i>POM152/2<math>\mu</math>/LEU2</i>                                  | (MIAO <i>et al.</i> 2006)         |
| PSW3422     | <i>RTN1</i> /CEN/ <i>LEU2</i>                                         | (DAWSON <i>et al.</i> 2009)       |
| PSW3673     | <i>APQ12/2<math>\mu</math>/LEU2</i>                                   | This Study                        |
| PSW3674     | <i>BBP1/2<math>\mu</math>/LEU2</i>                                    | This Study                        |
| PSW3675     | <i>BRR6/2<math>\mu</math>/LEU2</i>                                    | This Study                        |
| PSW3676     | <i>MPS2/2<math>\mu</math>/LEU2</i>                                    | This Study                        |
| PSW3592     | <i>leu2<math>\Delta</math>0::DsRED-HDEL:LEU2</i> integration cassette | This Study                        |

BEVIS, B. J., A. T. HAMMOND, C. A. REINKE and B. S. GLICK, 2002 De novo formation of transitional ER sites and Golgi structures in *Pichia pastoris*. *Nat Cell Biol* 4: 750-756.

CHIAL, H. J., M. P. ROUT, T. H. GIDDINGS and M. WINEY, 1998 *Saccharomyces cerevisiae* Ndc1p is a shared component of nuclear pore complexes and spindle pole bodies. *J Cell Biol* 143: 1789-1800.

CHRISTIANSON, T. W., R. S. SIKORSKI, M. DANTE, J. H. SHERO and P. HIETER, 1992 Multifunctional yeast high-copy-number shuttle vectors. *Gene* 110: 119-122.

DAWSON, T. R., M. D. LAZARUS, M. W. HETZER and S. R. WENTE, 2009 ER membrane-bending proteins are necessary for de novo nuclear pore formation. *J Cell Biol* 184: 659-675.

MIAO, M., K. J. RYAN and S. R. WENTE, 2006 The integral membrane protein Pom34p functionally links nucleoporin subcomplexes. *Genetics* 172: 1441-1457.

SHANER, N. C., R. E. CAMPBELL, P. A. STEINBACH, B. N. GIEPMANS, A. E. PALMER *et al.*, 2004 Improved monomeric red, orange and yellow fluorescent proteins derived from *Discosoma* sp. red fluorescent protein. *Nat Biotechnol* 22: 1567-1572.

SIKORSKI, R. S., and P. HIETER, 1989 A system of shuttle vectors and yeast host strains designed for efficient manipulation of DNA in *Saccharomyces cerevisiae*. *Genetics* 122: 19-27.
