# Supplementary material
Source: PubMed Central journal article supplement (PMC3454875)
Supplement: supp_112.141465_FigureS2.pdf [file supp_112.141465_FigureS2.pdf]

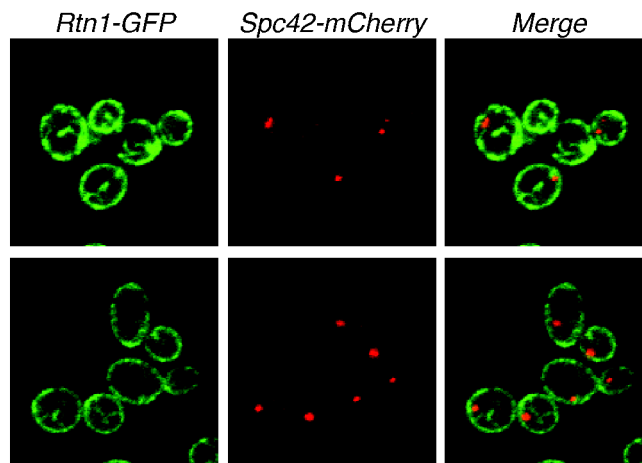

**Figure S2** Rtn1 does not colocalize with SPBs. Asynchronous cultures of *nup120Δ RTN1-GFP*(SWY4047) expressing pSPC42-MCHERRY were grown to log phase and imaged. Scale bar, 2  $\mu$ m
