# Supplementary material
Source: PubMed Central journal article supplement (PMC3454875)
Supplement: supp_112.141465_FigureS3.pdf [file supp_112.141465_FigureS3.pdf]

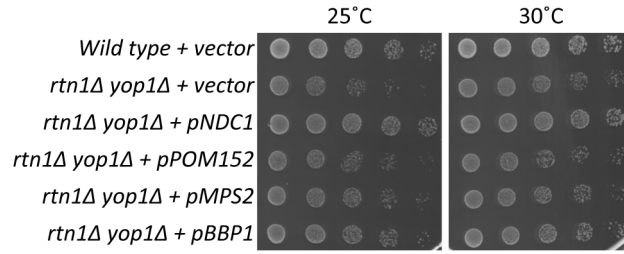

**Figure S3** Overexpression of NDC1 results in rescue of *rtn1Δ yop1Δ* growth defects. Wildtype or *rtn1Δ yop1Δ* cells were transformed with plasmids expressing *NDC1*, *POM152*, *MPS2*, *BBP1*, or empty vector and grown to early log phase at 30°C in synthetic media lacking leucine. Strains were tested for growth at 25°C and 30°C.
