# Supplementary material
Source: PubMed Central journal article supplement (PMC3454875)
Supplement: supp_112.141465_TableS1.pdf [file supp_112.141465_TableS1.pdf]

**Table S1 Yeast strains used in this study.**

| Strain         | Genotype                                                                                                             | Source                            |
|----------------|----------------------------------------------------------------------------------------------------------------------|-----------------------------------|
| BY4741         | <i>MATa his3Δ1 leu2Δ0 LYS2 met15Δ0 ura3Δ0</i>                                                                        | (MORTIMER and JOHNSTON 1986)      |
| BY4742         | <i>MATα his3Δ1 leu2Δ0 lys2Δ0 MET15 ura3Δ0</i>                                                                        | (MORTIMER and JOHNSTON 1986)      |
| Bbp1-GFP       | <i>MATa BBP1-GFP:HIS3 his3Δ1 leu2Δ0 met15Δ0 ura3Δ0</i>                                                               | (HUH <i>et al.</i> 2003)          |
| Ndc1-GFP       | <i>MATa NDC1-GFP:HIS3 his3Δ1 leu2Δ0 met15Δ0 ura3Δ0</i>                                                               | (HUH <i>et al.</i> 2003)          |
| Rtn1-GFP       | <i>MATa RTN1-GFP:HIS3 his3Δ1 leu2Δ0 met15Δ0 ura3Δ0</i>                                                               | (HUH <i>et al.</i> 2003)          |
| Ndc1-TAP       | <i>MATa NDC1-TAP:HIS3 his3Δ1 leu2Δ0 met15Δ0 ura3Δ0</i>                                                               | (GHAEMMAGHAMI <i>et al.</i> 2003) |
| <i>nup120Δ</i> | <i>MATa nup120::KanR his3Δ1 leu2Δ0 met15Δ0 ura3Δ0</i>                                                                | (WINZELER <i>et al.</i> 1999)     |
| <i>nup133Δ</i> | <i>MATa nup133::KanR his3Δ1 leu2Δ0 met15Δ0 ura3Δ0</i>                                                                | (WINZELER <i>et al.</i> 1999)     |
| SLJ001         | <i>MATa bar1::hisG;ura3-1;leu2-3,112;trp1-1;his3-11,15;ade2-1;can1-100;GAL+</i>                                      | This Study                        |
| SLJ173         | <i>MATα bar1::hisG;ura3-1;leu2-3,112;trp1-1;his3-11,15;ade2-1;can1-100;GAL+</i>                                      | This Study                        |
| SLJ1433        | <i>MATa trp1::GAL-myc-SPC42-TRP1</i>                                                                                 | (JASPERSEN <i>et al.</i> 2002)    |
| SLJ3828        | <i>MATa yop1::HygR rtn1::KanR trp1::GAL-myc-SPC42-TRP1</i>                                                           | This Study                        |
| SLJ5572        | <i>MATa his3Δ200 trp1-901 leu2-3,112 ade2 LYS2:::(lexAop)4-HIS3 ura3:::(lexAop)8-lacZ ade2:::(lexAop)8-ADE2 GAL4</i> | This Study                        |
| SLJ5975        | <i>MATα NDC1-3×HA-HIS3MX6:</i>                                                                                       | This Study                        |
| SLJ5976        | <i>MATa YOP1-3×FLAG-KanR</i>                                                                                         | This Study                        |
| SLJ5977        | <i>MATα NDC1-3×HA-HIS3MX6 YOP1-3×FLAG-KanR</i>                                                                       | This Study                        |
| SLJ5572        | <i>MATa his3Δ200 trp1-901 leu2-3,112 ade2 LYS2:::(lexAop)4-HIS3 ura3:::(lexAop)8-lacZ (lexAop)8-ADE2 GAL4</i>        | Dual Biotech NMY51                |
| SWY3810        | <i>MATa rtn1::KanR yop1::KanR ura3Δ0 leu2Δ0 met15Δ0 his3Δ1</i>                                                       | (DAWSON <i>et al.</i> 2009)       |
| SWY3811        | <i>MATα rtn1::KanR yop1::KanR ura3Δ0 leu2Δ0 his3Δ1 lys2Δ0</i>                                                        | (DAWSON <i>et al.</i> 2009)       |
| SWY4047        | <i>MATα nup133::KanR RTN1-GFP:HIS3 ura3Δ0 leu2Δ0 his3Δ1 lys2Δ0</i>                                                   | (DAWSON <i>et al.</i> 2009)       |
| SWY4522        | <i>MATa NDC1-GFP:HIS3 his3Δ1 met15Δ0 ura3Δ0 leu2Δ0::DsRed-HDEL:LEU2</i>                                              | This Study                        |
| SWY4616        | <i>MATα GFP-TUB3 his3Δ1 leu2Δ0 ura3Δ0 met15Δ0</i>                                                                    | This Study                        |
| SWY4617        | <i>MATa GFP-TUB3 his3Δ1 leu2Δ0 ura3Δ0 met15Δ0</i>                                                                    | This Study                        |
| SWY4636        | <i>MATα NDC1-TAP:HIS3 RTN1-GFP:HIS3 his3Δ1 leu2Δ0 ura3Δ0</i>                                                         | This Study                        |
| SWY4637        | <i>MATa NDC1-TAP:HIS3 RTN1-GFP:HIS his3Δ1 leu2Δ0 ura3Δ0</i>                                                          | This Study                        |
| SWY4725        | <i>MATα rtn1::KanR yop1::KanR NIC96-GFP:HIS3 met15Δ0 his3Δ1 leu2Δ0 ura3Δ0</i>                                        | This Study                        |
| SWY4877        | <i>MATα rtn1::KanR yop1::KanR GFP-TUB3 his3Δ1 leu2Δ0 ura3Δ0 met15Δ0</i>                                              | This Study                        |
| SWY4878        | <i>MATα rtn1::KanR yop1::KanR GFP-TUB3 his3Δ1 leu2Δ0 ura3Δ0 met15Δ0</i>                                              | This Study                        |
| SWY4906        | <i>MATa rtn1::KanR yop1::KanR leu2Δ0::DsRed-HDEL:LEU2 ndc1-GFP:HIS3 ura3Δ0</i>                                       | This Study                        |

|         |                                                                                                |            |
|---------|------------------------------------------------------------------------------------------------|------------|
| SWY4934 | <i>MATa rtn1::KanR yop1::KanR GFP-TUB3 his3Δ1 leu2Δ0 ura3Δ0 lys2Δ0</i>                         | This Study |
| SWY4935 | <i>MATa rtn1::KanR yop1::KanR GFP-TUB3 his3Δ1 leu2Δ0 ura3Δ0 met15Δ0</i>                        | This Study |
| SWY4950 | <i>MATa rtn1::KanR yop1::KanR BBP1-GFP:HIS3 NIC96-mcherry:HYGB his3Δ1 leu2Δ0 ura3Δ0 lys2Δ0</i> | This Study |
| SWY4970 | <i>MATa NIC96-mcherry:HYGB BBP1-GFP:HIS3 his3Δ1 leu2Δ0 ura3Δ0</i>                              | This Study |
| SWY4971 | <i>MATa nup120::KanR NIC96-mcherry:HYGB BBP1-GFP:HIS3 his3Δ1 leu2Δ0 ura3Δ0</i>                 | This Study |
| SWY4972 | <i>MATa rtn1::KanR yop1::KanR SEC63-GFP:HIS3 his3Δ1 leu2Δ0::DsRED-HDEL:LEU2 ura3Δ0</i>         | This Study |
| SWY5033 | <i>MATα nup133::KanR NIC96-mcherry:HYGB BBP1-gfp:HIS3 his3Δ1 leu2Δ0 ura3Δ0 lys2Δ0 met15Δ0</i>  | This Study |

---

\* All strains beginning with "SLJ" are derivatives of W303 and all strains beginning with "SWY" are derivatives of S288C.

- DAWSON, T. R., M. D. LAZARUS, M. W. HETZER and S. R. WENTE, 2009 ER membrane-bending proteins are necessary for de novo nuclear pore formation. *J Cell Biol* 184: 659-675.
- GHAEMMAGHAMI, S., W. K. HUH, K. BOWER, R. W. HOWSON, A. BELLE *et al.*, 2003 Global analysis of protein expression in yeast. *Nature* 425: 737-741.
- HUH, W. K., J. V. FALVO, L. C. GERKE, A. S. CARROLL, R. W. HOWSON *et al.*, 2003 Global analysis of protein localization in budding yeast. *Nature* 425: 686-691.
- JASPERSEN, S. L., T. H. GIDDINGS and M. WINEY, 2002 Mps3p is a novel component of the yeast spindle pole body that interacts with the yeast centrin homologue Cdc31p. *J Cell Biol* 159: 945-956.
- MORTIMER, R. K., and J. R. JOHNSTON, 1986 Genealogy of principal strains of the yeast genetic stock center. *Genetics* 113: 35-43.
- WINZELER, E. A., D. D. SHOEMAKER, A. ASTROMOFF, H. LIANG, K. ANDERSON *et al.*, 1999 Functional characterization of the *S. cerevisiae* genome by gene deletion and parallel analysis. *Science* 285: 901-906.
