# Supplementary material
Source: PubMed Central journal article supplement (PMC3454875)
Supplement: supp_112.141465_TableS2.pdf [file supp_112.141465_TableS2.pdf]

**Table S2 Plasmids used in this study.**

| Plasmid     | Genotype                                                              | Source                            |
|-------------|-----------------------------------------------------------------------|-----------------------------------|
| dRed-HDEL   | <i>trp1::DsRED-HDEL:TRP1</i> integration plasmid                      | (BEVIS <i>et al.</i> 2002)        |
| pBS35       | <i>mCHERRY/HYGB</i> integration plasmid                               | (SHANER <i>et al.</i> 2004)       |
| pRS315      | CEN/ <i>LEU2</i>                                                      | (SIKORSKI and HIETER 1989)        |
| pRS425      | 2 $\mu$ / <i>LEU2</i>                                                 | (CHRISTIANSON <i>et al.</i> 1992) |
| pRS315.NDC1 | <i>NDC1</i> /CEN/ <i>LEU2</i>                                         | (CHIAL <i>et al.</i> 1998)        |
| PSJ906      | <i>SPC42-mCHERRY-HIS/LEU2</i>                                         | This Study                        |
| PSW863      | <i>POM152/2<math>\mu</math>/LEU2</i>                                  | (MIAO <i>et al.</i> 2006)         |
| PSW3422     | <i>RTN1</i> /CEN/ <i>LEU2</i>                                         | (DAWSON <i>et al.</i> 2009)       |
| PSW3673     | <i>APQ12/2<math>\mu</math>/LEU2</i>                                   | This Study                        |
| PSW3674     | <i>BBP1/2<math>\mu</math>/LEU2</i>                                    | This Study                        |
| PSW3675     | <i>BRR6/2<math>\mu</math>/LEU2</i>                                    | This Study                        |
| PSW3676     | <i>MPS2/2<math>\mu</math>/LEU2</i>                                    | This Study                        |
| PSW3592     | <i>leu2<math>\Delta</math>0::DsRED-HDEL:LEU2</i> integration cassette | This Study                        |

BEVIS, B. J., A. T. HAMMOND, C. A. REINKE and B. S. GLICK, 2002 De novo formation of transitional ER sites and Golgi structures in *Pichia pastoris*. *Nat Cell Biol* 4: 750-756.

CHIAL, H. J., M. P. ROUT, T. H. GIDDINGS and M. WINEY, 1998 *Saccharomyces cerevisiae* Ndc1p is a shared component of nuclear pore complexes and spindle pole bodies. *J Cell Biol* 143: 1789-1800.

CHRISTIANSON, T. W., R. S. SIKORSKI, M. DANTE, J. H. SHERO and P. HIETER, 1992 Multifunctional yeast high-copy-number shuttle vectors. *Gene* 110: 119-122.

DAWSON, T. R., M. D. LAZARUS, M. W. HETZER and S. R. WENTE, 2009 ER membrane-bending proteins are necessary for de novo nuclear pore formation. *J Cell Biol* 184: 659-675.

MIAO, M., K. J. RYAN and S. R. WENTE, 2006 The integral membrane protein Pom34p functionally links nucleoporin subcomplexes. *Genetics* 172: 1441-1457.

SHANER, N. C., R. E. CAMPBELL, P. A. STEINBACH, B. N. GIEPMANS, A. E. PALMER *et al.*, 2004 Improved monomeric red, orange and yellow fluorescent proteins derived from *Discosoma* sp. red fluorescent protein. *Nat Biotechnol* 22: 1567-1572.

SIKORSKI, R. S., and P. HIETER, 1989 A system of shuttle vectors and yeast host strains designed for efficient manipulation of DNA in *Saccharomyces cerevisiae*. *Genetics* 122: 19-27.
